# Supplementary material
Source: publisher figshare collection journal article supplement (https://adisjournals.figshare.com/ndownloader/files/35142472)
Supplement: Supplementary file 1 [file 35142472]

# Current and Emerging Strategies to Inhibit Type 2 Inflammation in Atopic Dermatitis

**Type 2 immunity** evolved to ensure epithelial barrier integrity and protect against parasitic helminths and noxious environmental substances. When dysregulated, type 2 immunity becomes **type 2 inflammation**, which is a principal driving force of several inflammatory diseases, such as **atopic dermatitis** and **asthma**.

Immune dysregulation in such diseases is often highly complex and involves many different cell types and inflammatory mediators. However, clinical studies of targeted therapies suggest that only a few components play a clinically significant role.

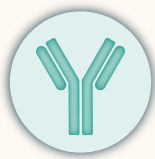

## Biologics that inhibit type 2 molecules

Targeting type 2 via IgE, cytokines and their receptors

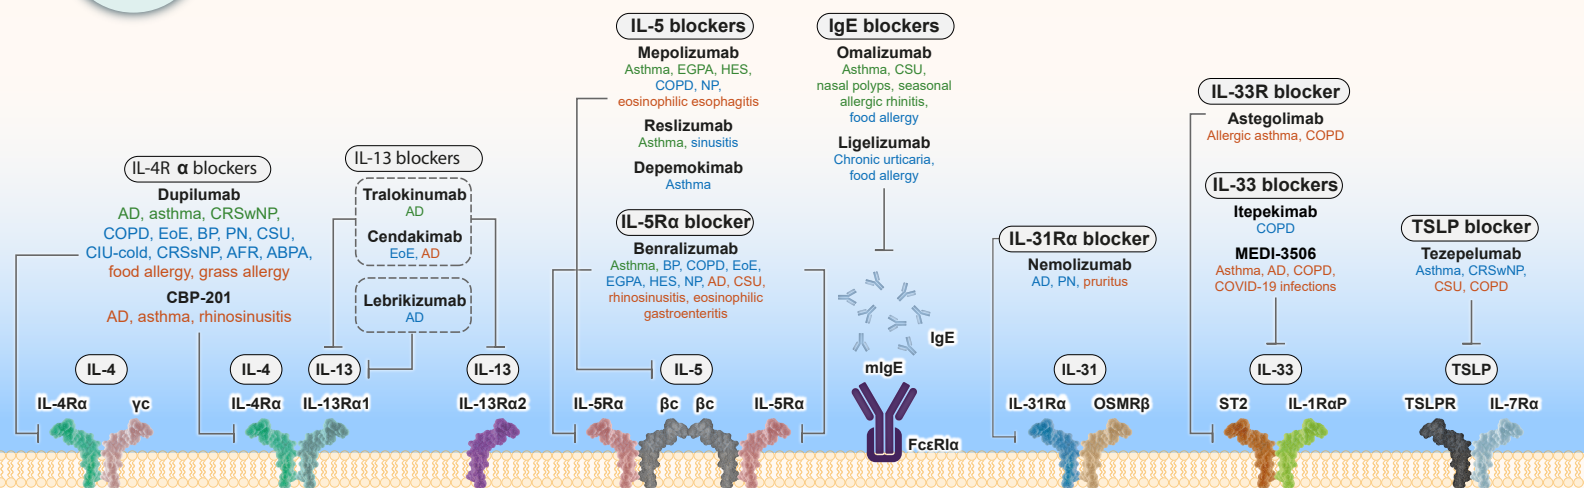

Clinical study phase or approval status as of March 2022 for each therapy by indication: **Approved** **Phase 3**, **Phase 2**

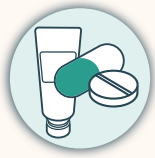

## JAK inhibitors targeting JAK signaling pathways\*

Simultaneous inhibition of type 1, 2, and 3 cytokines

Selectivity is dose-dependent

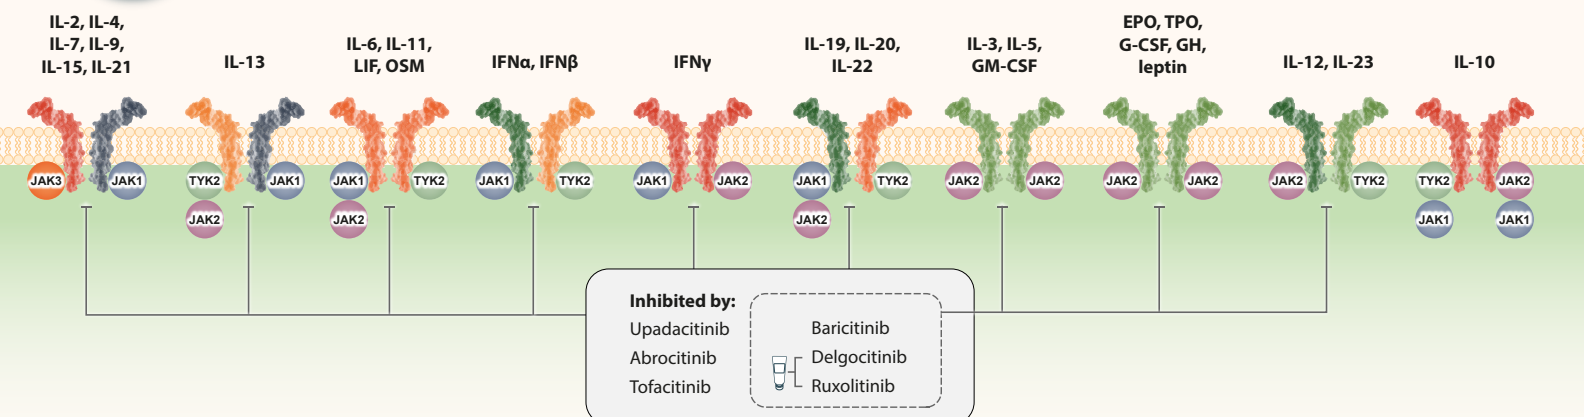

\*Specific diseases for which therapies are approved are not shown here due to the wide range of inflammatory diseases for which JAK inhibitors are approved.

Studies of drugs targeting type 2 immune mediators helped **clarify the biological mechanisms** that underlie type 2 immunity and that **provide therapeutic advances** for type 2 inflammatory diseases.

Authors: El-Bdaoui Haddad, Sonya L. Cyr, Kazuhiko Arima, Robert A. McDonald, Noah A. Levit, Frank O. Nestle.

The infographic represents the opinions of the authors. For a full list of declarations, including funding and author disclosure statements, please see the full text online. © The authors, CC-BY-NC [2022].
